# Supplementary material for: Detection of multiple mycotoxin occurrences in soy animal feed by traditional mycological identification combined with molecular species identification
Source: PubMed Central journal article supplement — Toxicol Rep. 2015 Jan 27;2:275–9. doi: 10.1016/j.toxrep.2015.01.006 (PMC5598493; doi:10.1016/j.toxrep.2015.01.006), 2015-01-27
Supplement: mmc1.pdf [file mmc1.pdf]

## Supplementary Table 1

Soy feed samples, year of isolation and toxin levels as detected by ELISA in samples collected between 2008-2010 in Italy.

| Seed lot ID      | Date       | Raw material | DON<br>mg kg <sup>-1</sup> | Fumonisin<br>mg kg <sup>-1</sup> | Aflatoxins<br>µg kg <sup>-1</sup> |
|------------------|------------|--------------|----------------------------|----------------------------------|-----------------------------------|
| S06 <sup>a</sup> | 15/10/2008 | Soyflour     | 2.1                        | ND <sup>b</sup>                  | 3.9                               |
| S07 <sup>a</sup> | 30/10/2008 | Soyflour     | 3.8                        | ND                               | ND                                |
| S08 <sup>a</sup> | 13/11/2008 | Soyflour     | 3.8                        | 0.16                             | 1.4                               |
| S09 <sup>a</sup> | 04/12/2008 | Soybean      | 2.7                        | 2.5                              | 0.8                               |
| S10              | 27/02/2009 | Soybean      | ND                         | 0.2                              | 1.4                               |
| S11              | 11/03/2009 | Soybean      | ND                         | ND                               | 1.7                               |
| S12              | 11/03/2009 | Soyflour     | 0.8                        | ND                               | 5.8                               |
| S13              | 27/03/2009 | Soyflour     | 3.1                        | ND                               | 1.5                               |
| S14              | 22/04/2009 | Soyflour     | ND                         | 0.2                              | 1.5                               |
| S15              | 22/04/2009 | Soybean      | ND                         | ND                               | ND                                |
| S16              | 13/05/2009 | Soyflour     | ND                         | ND                               | 3.9                               |
| S17              | 13/05/2009 | Soyflour     | 2.7                        | ND                               | 2.5                               |
| S18              | 27/05/2009 | Soybean      | 1.1                        | ND                               | 3.2                               |
| S19              | 12/06/2009 | Soybean      | ND                         | ND                               | 3.5                               |
| S20              | 26/06/2009 | Soyflour     | 3.6                        | ND                               | 4.4                               |
| S21              | 25/09/2009 | Soybean      | ND                         | ND                               | ND                                |
| S22              | 25/09/2009 | Soyflour     | 6.4                        | ND                               | 3.7                               |
| S23              | 12/11/2009 | Soybean      | ND                         | ND                               | ND                                |
| S24              | 10/12/2009 | Soybean      | 1.5                        | ND                               | 4.6                               |
| S25              | 10/12/2009 | Soybean      | 2.9                        | 0.2                              | 3.1                               |
| S26              | 14/01/2010 | Soybean      | ND                         | ND                               | 2.9                               |
| S27              | 14/01/2010 | Soyflour     | 2.6                        | ND                               | 5.9                               |
| S28              | 14/01/2010 | Soybean      | 2.8                        | 0.1                              | 3.1                               |
| S29              | 27/01/2010 | Soybean      | ND                         | ND                               | 1.1                               |
| S30              | 16/02/2010 | Soybean      | 2.1                        | 0.1                              | 2.9                               |
| S31              | 01/03/2010 | Soybean      | 2.4                        | 0.2                              | 1.3                               |
| S32              | 11/03/2010 | Soybean      | 1.6                        | ND                               | 2.8                               |
| S33              | 29/03/2010 | Soybean      | 2.8                        | ND                               | 3.1                               |
| S34              | 29/03/2010 | Soybean      | 4.0                        | 0.5                              | 3.6                               |
| S35              | 20/04/2010 | Soybean      | 1.0                        | ND                               | 2.6                               |
| S36              | 20/05/2010 | Soyflour     | 0.9                        | ND                               | 2.9                               |
| S37              | 21/06/2010 | Soybean      | 1.0                        | ND                               | 2.5                               |
| S38              | 21/06/2010 | Soyflour     | 3.6                        | 0.3                              | 4.9                               |
| S39              | 30/06/2010 | Soyflour     | 1.6                        | ND                               | 1.9                               |
| S40              | 30/06/2010 | Soyflour     | 5.1                        | ND                               | 5.1                               |
| S41              | 21/07/2010 | Soyflour     | 1.2                        | 0.1                              | 1.8                               |

<sup>a</sup> seed lots used for specific characterization of *Fusarium* population (see Table 2).

<sup>b</sup> ND = not detected
